# Supplementary material
Source: Research Square preprint supplement (doi:10.21203/rs.3.rs-9194025/v1)
Supplement: Supplementary file 1 [file 2f05cd37b00707fb57e88773.docx]

CMJ = countermovement jump.

| **Table 1.** Descriptive statistic definitions | |
| --- | --- |
| **CMJ Metrics** | **Definitions** |
| Impulse (Ns)  Relative Peak Force (N)  Relative Peak Power (W·kg-1)  Relative Mean Power (W·kg-1)  Modified Reactive Strength Index (m·s-1)  Countermovement Jump Stiffness (N·m-1)  Peak Velocity (m·s-1)  Countermovement Depth (cm)  Peak Joint Flexion Angle (**◦**)  Joint Acceleration (**◦**·s2)  Joint Peak Velocity (**◦**·s-1)  Duration (ms)  Impulse 50 ms (N·s-1)  Impulse 100 ms (N·s-1)  Relative Rate of Force Development (N·s-1·kg-1)  Rate of Force Development 50 ms (N·s-1)  Rate of Force Development 100 ms (N·s-1)  Rate of Force Development 200 ms (N·s-1)  Relative Rate of Power Development (W·s-1·kg-1)  Relative Rate of Power Development 50 ms (W·s-1·kg-1)  Relative Rate of Power Development 100 ms (W·s-1·kg-1)  Time to Peak Joint Flexion (ms)  Time to Peak Joint Extension (ms) | Integration of force over a given timeframe.  Maximum newtons applied compared to body mass.  Maximum watts applied as a proportion of body mass.  Average watts applied as a proportion of body mass.  Ratio between jump height and time to take-off.  Ratio between peak vertical force and minimum displacement.  Change in center of mass position over time.  Maximum displacement from the start of movement to take-off.  Maximum flexion angle formed between two joints.  Maximum rate of change from initial joint velocity to final joint velocity.  Maximum rate of change towards peak joint displacement over time.  Total movement phase time.  Net impulse produced at 50 ms.  Net impulse produced at 100 ms.  Time to peak force application compared to body mass.  Peak force produced at 50 ms.  Peak force produced at 100 ms.  Peak force produced at 200 ms.  Time to peak power application compared to body mass.  Peak power produced at 50 ms.  Peak power produced at 100 ms.  Duration from initial joint flexion to minimum angle.  Duration from initial joint extension to neutral angle. |

| **Table 2.** Group descriptive statistics and reliability of CMJ output metrics. | | |
| --- | --- | --- |
| **CMJ Metrics** | **Mean ± *SD*** | **ICC (95% CI)** | |
| Jump Height (cm)  Modified Reactive Strength Index (m·s-1)  Take-off Peak Velocity (m·s-1)  Braking Peak Velocity (m·s-1)  Relative Propulsive Impulse (Ns·kg-1)  Relative Braking Impulse (Ns·kg-1)  Relative Propulsive Peak Force (N·kg-1)  Relative Braking Peak Force (N·kg-1)  Relative Propulsive Peak Power (W·kg-1)  Relative Braking Peak Power (W·kg-1)  Relative Propulsive Mean Power (W·kg-1)  Relative Braking Mean Power (W·kg-1)  Countermovement Jump Stiffness (N·m-1) | 41.6 ± 12.3  0.5 ± 0.2  2.8 ± 0.4  -1.1 ± 0.3  2.9 ± 4.3  0.6 ± 1.9  24.8 ± 3.6  20.9 ± 3.8  60.5 ± 13.5  15.4 ± 6.3  29.4 ± 7.4  5.5 ± 1.7  9207.1 ± 10718.6 | 0.90 (0.85-0.94)  0.99 (0.98-1.00)  0.97 (0.94-0.98)  0.79 (0.70-0.85)  0.90 (0.85-0.94)  0.82 (0.75-0.88)  0.96 (0.93-0.98)  0.95 (0.92-0.97)  0.87 (0.82-0.91)  0.72 (0.63-0.79)  0.90 (0.85-0.94)  0.86 (0.80-0.90)  0.92 (0.88-0.95) | |

CMJ = countermovement jump; SD = standard deviation; ICC = intraclass correlation coefficient; CI = confidence interval.

| **Table 3.** Group descriptive statistics and reliability of CMJ kinematic metrics. | | |
| --- | --- | --- |
| **CMJ Metrics** | **Mean ± *SD*** | **ICC (95% CI)** | |
| Countermovement Depth (cm)  Peak Hip Flexion Angle (**◦**)  Peak Knee Flexion Angle (**◦**)  Peak Ankle Dorsiflexion Angle (**◦**)  Hip Flexion Acceleration (**◦**·s2)  Knee Flexion Acceleration (**◦**·s2)  Ankle Dorsiflexion Acceleration (**◦**·s2)  Hip Flexion Peak Velocity (**◦**·s-1)  Knee Flexion Peak Velocity (**◦**·s-1)  Ankle Dorsiflexion Peak Velocity (**◦**·s-1)  Hip Extension Acceleration (**◦**·s2)  Knee Extension Acceleration (**◦**·s2)  Ankle Plantarflexion Acceleration (**◦**·s2)  Hip Extension Peak Velocity (**◦**·s-1)  Knee Extension Peak Velocity (**◦**·s-1)  Ankle Plantarflexion Peak Velocity (**◦**·s-1) | -30.5 ± 17.3  70.7 ± 14.3  96.7 ± 9.1  70.2 ± 4.5  -643.3 ± 281.1  -369.1 ± 175.1  -183.8 ± 149.6  -325.3 ± 71.8  -223.5 ± 51.3  -102.1 ± 65.1  1675.8 ± 316.8  4060.6 ± 1443.3  3066.5 ± 1107.1  599.4 ±76.7  938.7 ± 150.5  968 ± 204.7 | 0.72 (0.63-0.79)  0.78 (0.70-0.84)  0.86 (0.80-0.90)  0.86 (0.80-0.90)  0.86 (0.80-0.90)  0.85 (0.79-0.90)  0.77 (0.69-0.83)  0.91 (0.87-0.94)  0.91 (0.87-0.94  0.84 (0.78-0.89)  0.76 (0.68-0.82)  0.80 (0.73-0.85)  0.94 (0.91-0.97)  0.70 (0.61-0.77)  0.92 (0.88-0.95)  0.91 (0.87-0.94) | |

CMJ = countermovement jump; SD = standard deviation; ICC = intraclass correlation coefficient; CI = confidence interval.

| **Table 4.** Group descriptive statistics and reliability of CMJ temporal metrics. | |  | |
| --- | --- | --- | --- |
| **CMJ Metrics** | **Mean ± *SD*** | | **ICC (95% CI)** | |
| Braking Duration (ms)  Propulsive Duration (ms)  Propulsive Impulse 50ms (N·s-1)  Propulsive Impulse 100ms (N·s-1)  Relative Braking Rate of Force Development (N·s-1·kg-1)  Relative Propulsive Rate of Force Development (N·s-1·kg-1)  Braking Rate of Force Development 100ms (N·s-1)  Propulsive Rate of Force Development 50ms (N·s-1)  Propulsive Rate of Force Development 100ms (N·s-1)  Propulsive Rate of Force Development 200ms (N·s-1)  Relative Propulsive Rate of Power Development (W·s-1·kg-1)  Relative Propulsive Rate of Power Development 50ms (W·s-1·kg-1)  Relative Propulsive Rate of Power Development 100ms (W·s-1·kg-1)  Time to Peak Hip Flexion (ms)  Time to Peak Knee Flexion (ms)  Time to Peak Ankle Dorsiflexion (ms)  Time to Peak Hip Extension (ms)  Time to Peak Knee Extension (ms)  Time to Peak Ankle Plantarflexion (ms) | 331.2 ± 109.6  293.6 ± 59.0  43.7 ± 15.9  88.8 ± 31.8  60.5 ± 46.4  28.7 ± 38.8  4254.1 ± 4405.3  -511 ± 3098.8  -5.7 ± 3025.5  -319.5 ± 3630.0  283.3 ± 130.0  229.5 ± 152.3  229.3 ± 126.8  563.5 ± 159.7  671.5 ± 171.2  622.9 ± 188.9  364 ± 47.7  254.5 ± 77.0  253.1 ± 60.6 | | 0.61 (0.50-0.70)  0.91 (0.87-0.94)  0.82 (0.75-0.88)  0.89 (0.84-0.93)  0.94 (0.91-0.97)  0.94 (0.91-0.97)  0.84 (0.78-0.89)  0.47 (0.35-0.58)  0.57 (0.46-0.67)  0.66 (0.56-0.74)  0.96 (0.93-0.98)  0.84 (0.78-0.89)  0.91 (0.87-0.94)  0.75 (0.67-0.81)  0.90 (0.85-0.94)  0.88 (0.83-0.92)  0.80 (0.73-0.86)  0.93 (0.90-0.96)  0.90 (0.85-0.94) | |

CMJ = countermovement jump; SD = standard deviation; ICC = intraclass correlation coefficient; CI = confidence interval.

**Table 5.** Retainedprincipal components and their braking-phase metric loadings.

| **Principal Component** | **Loading** | **Cos2** | **V-statistic** | ***p* value** |
| --- | --- | --- | --- | --- |
| **PC1** |  |  |  |  |
| Hip Flexion Acceleration  Knee Flexion Acceleration  Time to Knee Flexion  Time to Hip Flexion  Relative Braking PP  Braking Impulse  Relative Braking PF  Relative Braking MP | +0.30  +0.30  +0.28  +0.28  -0.29  -0.26  -0.23  -0.22 | 0.09  0.09  0.08  0.08  0.09  0.07  0.05  0.05 | 2.13  2.12  1.99  1.97  -2.10  -1.82  -1.63  -1.57 | **<0.001***  **<0.001***  **<0.001***  **<0.001***  **<0.001***  >0.05  >0.05  >0.05 |
| **PC2** |  |  |  |  |
| CMJ Stiffness  Relative Braking RFD  Braking Duration  Braking RFD@100 ms  CM Depth  Relative Braking MP | +0.39  +0.38  -0.35  -0.30  +0.29  +0.31 | 0.15  0.14  0.13  0.10  0.09  0.09 | 2.77  2.69  -2.52  2.23  2.10  -2.12 | **<0.001***  **<0.001***  **<0.001***  **<0.001***  **<0.001***  **<0.001*** |
| **PC3** |  |  |  |  |
| Peak Knee Flex Angle  Peak Ankle Dorsi Angle  Peak Hip Flexion Angle | +0.55  +0.43  +0.32 | 0.30  0.19  0.10 | 3.91  3.09  2.25 | **<0.001***  **<0.001***  **<0.001*** |

Statistical significance at *p* ≤ 0.05 is indicated as * for a significant contribution to the principal component; PP= Peak Power; PF = Peak Force; MP = mean power; CMJ = countermovement jump; RFD = rate of force development. CM = countermovement.

**Table 6.** Between cluster comparison of jump height and principal components.

| **Variable** | **Cluster One (*n* = 22)** | **Cluster Two (*n* = 29)** | ***p* value** | **Cohen’s *d* (95% CI)** |
| --- | --- | --- | --- | --- |
| Group Jump Height  Male Jump Height  Female Jump Height | 46.92 ± 13.65  50.56 ± 10.69  23.87 ± 21.25 | 37.54 ± 9.47  46.45 ± 7.10  32.10 ± 5.94 | **0.006***  0.217  **0.003*** | **0.82 (0.23-1.41)***  0.45 (-0.28-1.18)  **0.53 (-0.33-1.39)*** |
| Principal Component 1 | 2.90 | -2.20 | **<0.001*** | **2.40 (1.66-3.14)*** |
| Principal Component 2 | -0.53 | 0.40 | 0.120 | 0.45 (-0.13-1.03) |
| Principal Component 3 | -0.12 | 0.09 | 0.622 | 0.14 (-0.43-0.71) |

Statistical significance at *p* ≤ 0.05 is indicated as * for a difference between clusters; CI = confidence interval.

| **Table 8.** Group stepwise linear regression model summary for CMJ height prediction. | | | | |
| --- | --- | --- | --- | --- |
| **Model inputs** | **B** | **β** | ***t*** | ***p* value** |
| Initial Step  Relative Propulsive Peak Power  Relative Propulsive Mean Power  Hip Extension Peak Velocity  Knee Extension Peak Velocity  Propulsive Impulse 100 ms  Propulsive Impulse 50 ms  Relative Propulsive Peak Force  Hip Flexion Peak Velocity  Hip Extension Acceleration  Knee Flexion Acceleration  Relative Propulsive Rate of Power Development  Knee Flexion Peak Velocity  Relative Propulsive Rate Power Development 100 ms  Relative Braking Power Peak  Hip Flex Acceleration  Relative Braking Peak Force  Knee Flexion Angle  Ankle Plantarflexion Peak Velocity  Time to Knee Flexion  Time to Hip Flexion  Ankle Dorsiflexion Acceleration  Braking Peak Velocity  Time to Ankle Dorsiflexion | 4.63  1.71  1.43  -5.78  -1.14  2.49  -3.09  -2.54  -4.19  -2.55  -4.03  -6.41  -1.30  -1.82  -2.67  -5.99  2.55  2.93  3.26  -2.77  1.49  5.10  1.51 | 1.01  2.20  5.22  1.54  4.28  9.16  2.97  7.92  1.37  4.76  1.09  9.12  5.15  1.45  3.48  2.39  3.40  9.95  3.78  3.81  2.59  2.06  1.63 | 4.60  6.86  2.73  -0.37  -0.27  0.27  -1.04  -0.32  -3.06  -0.54  -3.70  -0.70  -2.53  -1.26  -0.77  -0.25  0.75  2.95  0.86  -0.73  0.57  0.03  0.93 | **<0.001***  **<0.001***  **0.011***  0.711  0.792  0.787  0.307  0.751  **0.005***  0.600  **<0.001***  0.488  **0.020***  0.219  0.449  0.804  0.460  **0.007***  0.400  0.474  0.571  0.980  0.363 |
| Final Step  Relative Propulsive Peak Power  Relative Propulsive Mean Power  Hip Extension Peak Velocity  Hip Extension Acceleration  Relative Propulsive Rate of Power Development  Knee Flexion Peak Velocity  Relative Propulsive Rate Power Development 100 ms  Relative Braking Peak Power  Hip Flexion Acceleration  Ankle Plantarflexion Peak Velocity  Time to Peak Ankle Dorsiflexion | 3.92  1.65  1.26  -3.72  -4.85  -8.47  -1.61  -2.50  -4.42  2.49  1.28 | 1.49  4.79  1.16  3.11  8.05  2.58  3.32  3.97  1.02  7.09  1.01 | 8.19  14.25  4.07  -4.62  -18.84  -2.01  -4.84  -6.30  -4.36  3.51  1.27 | **<0.001***  **<0.001***  **<0.001***  **<0.001***  **<0.001***  **0.052***  **<0.001***  **<0.001***  **<0.001***  **0.001***  0.213 |
| Statistical significance at *p* ≤ 0.05 is indicated as * for a significant contribution to the model; B = unstandardized coefficients; **β** = standardized coefficients standard error; t = t value. | | | | |

| **Table 9.** Cluster one stepwise linear regression model summary for CMJ height prediction. | | | | |
| --- | --- | --- | --- | --- |
| **Model inputs** | **B** | **β** | ***t*** | ***p* value** |
| Initial Step  Relative Propulsive Peak Power  Relative Propulsive Mean Power  Hip Extension Peak Velocity  Knee Extension Peak Velocity  Propulsive Impulse 100 ms  Propulsive Impulse 50 ms  Relative Propulsive Peak Force  Hip Extension Acceleration  Relative Propulsive Rate of Power Development  Knee Flexion Peak Velocity  Relative Propulsive Rate of Power Development 100 ms  Relative Braking Peak Force  Peak Knee Flexion Angle  Ankle Plantarflexion Peak Velocity  Braking Duration  Relative Propulsive Rate of Power Development 50 ms  Relative Braking Rate of Force Development | -0.02  2.04  0.05  0.01  0.14  0.18  0.40  -0.02  -0.01  0.02  -0.07  -0.07  -0.04  <-0.01  -26.09  0.02  -0.14 | 0.47  0.65  0.03  <0.01  0.14  0.33  1.07  0.01  0.03  0.02  0.06  0.36  0.06  <0.01  21.64  0.05  0.11 | -0.04  3.16  1.60  1.98  1.00  0.52  0.38  -1.65  -0.24  1.28  -1.14  -1.99  -0.78  -0.80  -1.21  0.54  -1.25 | 0.969  **0.034***  0.186  0.119  0.374  0.629  0.724  0.174  0.824  0.271  0.316  0.117  0.482  0.472  0.295  0.618  0.280 |
| Final Step  Relative Propulsive Mean Power  Hip Extension Peak Velocity  Knee Extension Peak Velocity  Propulsive Impulse 100 ms  Relative Propulsive Peak Force  Hip Extension Acceleration  Knee Flexion Peak Velocity  Relative Propulsive Rate of Power Development 100 ms  Relative Braking Peak Force  Ankle Plantarflexion Peak Velocity  Braking Duration  Relative Propulsive Rate of Power Development 50 ms  Relative Braking Rate of Force Development | 2.10  3.97  5.07  1.82  2.37  -1.37  9.70  -9.66  -5.70  -1.77  -1.82  4.70  -1.24 | 1.10  1.37  1.74  4.24  2.13  4.02  7.33  9.48  2.36  8.93  1.16  1.06  4.68 | 19.11  2.89  2.92  4.30  1.12  -3.41  1.32  -10.19  -2.41  -1.99  -1.58  4.42  -2.64 | **<0.001***  **0.020***  **0.019***  **0.003***  0.300  **0.009***  0.222  **<0.001***  **0.042***  0.082  0.154  **0.002***  **0.030*** |
| Statistical significance at *p* ≤ 0.05 is indicated as * for a significant contribution to the model; B = unstandardized coefficients; β = standardized coefficients standard error; t = t value. | | | | |

| **Table 10.** Cluster two stepwise linear regression model summary for CMJ height prediction. | | | | |
| --- | --- | --- | --- | --- |
| **Model inputs** | **b** | **β** | ***t*** | ***p* value** |
| Initial Step  Relative Propulsive Peak Power  Relative Propulsive Mean Power  Propulsive Rate of Force Development 100 ms | 1.03  -0.46  <0.01 | 0.13  0.22  <0.01 | 8.12  -2.14  1.52 | **<0.001***  **0.043***  0.141 |
| Final Step  Relative Propulsive Peak Power  Relative Propulsive Mean Power  Propulsive Rate of Force Development 100 ms | 1.03  -0.46  <0.01 | 0.13  0.22  <0.01 | 8.12  -2.14  1.52 | **<0.001***  **0.043***  0.141 |
| Statistical significance at *p* ≤ 0.05 is indicated as * for a significant contribution to the model; B = unstandardized coefficients; *SE* B = standardized coefficients standard error; t = t value. | | | | |
